# Supplementary material for: Triple helix and residential development in a science and technology park: the role of intermediaries
Source: Springer Nature journal article supplement (doi:10.1186/s40604-014-0010-1), 2014-12-01
Supplement: MOESM1 [file 11901834]

## **Multilingual abstracts**

### **Triple Helix and Residential Development in a Science and Technology Park: The Role of Intermediaries**

**Author: Jürgen Gohlke**

#### **Spanish**

### **La Triple Hélice y el desarrollo residencial en un parque científico y tecnológico: la función de los intermediarios**

#### **Resumen**

Los parques científicos y tecnológicos son la expresión tridimensional de la creciente importancia de la innovación, la creatividad y el conocimiento como recursos económicos. Las ciudades de las ciencias son el siguiente paso: asentamientos urbanos basados en el conocimiento. Gracias a un proyecto de viviendas en desarrollo actualmente, el parque científico y tecnológico de Berlin-Adlershof está experimentando una transformación gradual en ciudad de las ciencias. Tomando Berlin-Adlershof como caso de estudio, este artículo examina de qué manera el enfoque de triple hélice puede ser aplicado de forma práctica al proceso de planificación del proyecto habitacional. Hasta ahora, el enfoque de triple hélice ha sido empleado para estudiar las disposiciones organizativas entre empresa, universidad y gobierno. Disposiciones éstas que son consideradas promotoras de los procesos de innovación. Basándose en este principio, este estudio se centra en los aspectos socioculturales del desarrollo urbano en el contexto de las ciudades de las ciencias, aspectos a los que se les ha prestado poca atención en las investigaciones de la triple hélice. El propósito es emplear el concepto de triple hélice para valorar el carácter innovador de la transformación gradual de un parque científico y tecnológico en ciudad de las ciencias a través del desarrollo residencial. Dentro del marco de este trabajo, entre noviembre de 2013 y enero de 2014 se realizaron entrevistas semi-estructuradas a especialistas implicados en el desarrollo de Adlershof. El estudio mostró que el enfoque de triple hélice no puede ser aplicado de forma satisfactoria a las interacciones entre los agentes implicados en el desarrollo residencial de las ciudades de las ciencias.

Como alternativa, proponemos un modelo de interacción que enfatiza el papel fundamental del intermediario en los procesos de planificación.

## **French**

### **Triple Hélice et développement résidentiel dans un parc scientifique et technique : le rôle des intermédiaires**

#### **Résumé**

Les parcs scientifiques et techniques sont l'expression tridimensionnelle de l'importance croissante de l'innovation, de la créativité et de la connaissance comme ressources économiques. Les cités de la science en sont l'étape suivante : des installations urbaines basées sur la connaissance. Dans le cadre d'un projet de logements en développement, le parc scientifique et technique de Berlin-Adlershorf expérimente à l'heure actuelle une transformation graduelle en ville des sciences. Prenant Berlin-Adlershorf comme cas d'étude, cet article examine en quoi le concept de Triple Hélice peut s'appliquer dans la pratique au processus de planification d'un projet d'habitations. Jusqu'à maintenant, le concept de Triple Hélice a été utilisé pour analyser les relations organisationnelles entre l'entreprise, l'université et les pouvoirs publics, relations que l'on considère comme capables de promouvoir les processus d'innovation. Partant de ce principe, cette étude examine les aspects socio-culturels du développement urbain dans le contexte des cités de la science, aspects auxquels on a porté peu d'attention dans les recherches sur la Triple Hélice. L'article se propose d'utiliser le concept de Triple Hélice pour évaluer le caractère innovateur de la transformation graduelle d'un parc scientifique et technique en cité de la science à travers le développement résidentiel. Dans le cadre de cette étude, de novembre 2013 à Janvier 2014, des entretiens semi-structurés avec des spécialistes d'Adlershorf ont été conduits. Les résultats de l'étude montrent que le concept de Triple Hélice ne peut pas s'appliquer de façon satisfaisante aux acteurs impliqués dans le développement résidentiel des cités de la science. Nous proposons comme alternative un modèle d'interaction qui met l'accent sur le rôle des intermédiaires dans les processus de planification.

## **Russian**

### **Тройная спираль и переход к жилому комплексу в парке науки и технологий: роль посредников**

#### **Абстракт**

Научно-технологические парки являются трехмерным выражением постоянно растущей важности инноваций, изобретательности и знаний как экономических ресурсов. Наукограды

как формы городского поселения, основанные на знаниях, являются следующим шагом в развитии. Благодаря жилищному проекту, разрабатываемому в настоящее время, научно-технологический парк Берлин-Адлерсхоф переживает постепенное превращение в наукоград. На примере этого научного парка, в статье рассмотрено в какой степени теория тройной спирали может быть применена в процессе планирования проекта жилищного строительства. В основном, теория тройной спирали применяется для изучения организационных аспектов между промышленностью, университетами и правительством, которые содействуют процессам инноваций.

Наше исследование сконцентрировано на социально-культурных аспектах развития городов в контексте наукоградов. Этим аспектам до сих пор уделялось мало внимания в исследованиях по тройной спирали. Целью данной статьи является применение теории тройной спирали для оценки инновационного характера постепенного перехода научно-технологического парка в наукоград через жилищное строительство. В рамках этого исследования были проведены в период с ноября 2013 года по январь 2014 года полуструктурированные интервью с представителями структур, соответствующих развитию парка Адлерсхофа. Исследование показало, что теория тройной спирали не может быть применена к взаимодействию субъектов, участвующих в жилищном строительстве наукограда. Кроме того, мы предлагаем модель взаимодействия, которая подчеркивает ключевую роль посредника в процессе планирования.

## Chinese

### 三螺旋和在科技园里的住宅开发：中介机构的作用

#### 摘要

科技园是作为经济资源的创新、创造性和知识的日益增加的重要性的三维表达。接下来的步骤是科学城：以知识为基础的城市住宅区形式。感谢一个目前被开发的安居工程，Berlin-Adlershof 科技园正在经历着逐渐朝科学城的转变。将 Berlin-Adlershof 科技园作为案例，这篇论文考察三螺旋途径通常在多大程度上用于安居工程的计划过程。迄今为止，三螺旋途径主要被用于研究产业、大学和政府的组织安排。人们认为这些组织安排会促进创新过程。基于这一信条，这项研究聚焦在科学城背景下城区发展的社会-文化方面。到目前为止，这些方面在三螺旋研究中很少受到关注。本文旨在利用三螺旋概念评定科技园逐渐朝科学城转变的创新性特征。在这个研究框架内，从2013年11月开始到2014年1月止，我们对一些重要的 Adlershof 开发者进行了半结构式专家访谈。研究结果表明：三螺旋途径通常不能被用于在科学城住宅开发主体之间的相互作用。此外，我们提出一个强调中介机构在计划过程中的关键作用的相互作用模型。

## Arabic

### المراوح الثلاثة والتنمية السكنية في مجتمعات العلوم والتكنولوجيا: دور الوسيط

#### ملخص

تعتبر مجتمعات العلوم والتكنولوجيا تعبير ثلاثي الأبعاد على الأهمية المتزايدة للابتكار والإبداع والمعارف كموارد اقتصادية. تشكل مدن العلوم الخطوة التالية نظراً لأنها شكل من أشكال الاستيطان الحضري القائم على المعرفة. بفضل مشروع الإسكان الذي وقع تطويره مؤخراً، يشهد مجتمع العلوم والتكنولوجيا ببرلين-ادلرسهوف تحولاً تدريجياً ليصبح مدينة علوم. يدرس هذا المقال إلى أي مدى يمكن استعمال نظرية المراوح الثلاثة للتخطيط لمشروع إسكان، اعتماداً على برلين-ادلرسهوف كدراسة حالة. تستخدم نظرية المراوح الثلاثة بالأساس لدراسة الترتيبات التنظيمية بين مجال الصناعة، والجامعات والحكومة، والتي تعتبر ضرورية لتعزيز عمليات الابتكار. استناداً على هذا المبدأ، تركز الدراسة الحالية على الجوانب الاجتماعية والثقافية للتنمية الحضرية في إطار مدن العلوم، نظراً إلى أن هذه الجوانب لم تحظ حتى الآن إلا بالقليل من الاهتمام في البحوث التي تتناول بالدرس نظرية المراوح الثلاثة. ويهدف هذا التوجه إلى استخدام مفهوم المراوح الثلاثة لتقييم الطابع الابتكاري للتحول التدريجي لمجتمع العلوم والتكنولوجيا في مدينة علوم من خلال التنمية السكانية. وقد أجريت، في إطار هذه الدراسة، مقابلات شبه منظمة مع ممثلي ذات الصلة بتنمية مجتمع برلين-ادلرسهوف بين تشرين الثاني/نوفمبر 2013 و 2014 في كانون الثاني/يناير. وأظهرت الدراسة أنه لا يمكن تطبيق نظرية المراوح الثلاثة لدراسة التفاعل بين العناصر الفاعلة في التنمية السكنية في مدن العلم. وبدلاً من ذلك، نقترح استعمال أنموذج للتفاعل، يسلط الضوء على الدور المحوري للوسيط في عملية التخطيط.

## Portuguese

### Hélice Tríplice e o Desenvolvimento Residencial em um Parque Científico e Tecnológico: O Papel dos Intermediários

#### Resumo

Parques científicos e tecnológicos são expressões tridimensionais da crescente importância da inovação, criatividade e conhecimento como recursos econômicos. Graças a um projeto de habitação atualmente em desenvolvimento, o parque científico e tecnológico Berlin-Adlershof está se transformando gradualmente em uma cidade da ciência. Tomando Berlin-Adlershof como estudo de caso, este artigo examina o grau em que a abordagem de hélice tríplice pode ser eficientemente aplicada ao processo de planejamento de um projeto de habitação. A abordagem de hélice tríplice tem sido, até agora, utilizada principalmente para estudar as modalidades de organização da indústria, universidade e governo em arranjos para fomentar processos de inovação. Baseando-se nesse princípio, o presente estudo foca nos aspectos socioculturais do desenvolvimento urbano no contexto de cidades da ciência, aspectos que receberam até agora pouca atenção na pesquisa de hélice tríplice. O objetivo é usar o conceito de hélice tríplice para avaliar o caráter inovador da

transformação gradual de um parque científico e tecnológico em uma cidade da ciência através do desenvolvimento residencial. No âmbito deste estudo, foram conduzidas entrevistas semiestruturadas com experts proeminentes para o desenvolvimento de Adlershof, entre novembro de 2013 e janeiro de 2014. O estudo mostrou que a abordagem de hélice tríplice não pode ser aplicada eficientemente à interação dos fatores envolvidos no desenvolvimento residencial em cidades da ciência. Alternativamente, propomos um modelo de interação que destaca o papel central do intermediário no processo de planejamento.
